# Supplementary material for: Sample Size Calculation: Inaccurate A Priori Assumptions for Nuisance Parameters Can Greatly Affect the Power of a Randomized Controlled Trial
Source: PubMed Central journal article supplement (PMC4501786; doi:10.1371/journal.pone.0132578), 2015-07-14
Supplement: pone.0132578.s001.pdf [file pone.0132578.s001.pdf]

## S1 Appendix

**Sample size calculations.** Considering a continuous outcome, the *a priori* hypothesis is a mean difference. Moreover, trialists need some assumption regarding the standard deviation of the outcome (often derived from previous studies) and set values for both the type I error (i.e.,  $\alpha$ ) and the nominal power of the trial (i.e.,  $1-\beta$ ). If we let  $\delta$  be the mean difference and  $\sigma$  the standard deviation of the outcome, the number of patients to be recruited in each group is [1]:

$$n = \frac{2(Z_{\frac{\alpha}{2}} + Z_{\beta})^2}{\Delta^2}$$

with the effect size

$$\Delta = \frac{\delta}{\sigma}$$

and  $Z_q$  is the q-percentile of a standard normal distribution.

If the outcome is dichotomous (e.g., a success rate), the clinical hypothesis is a rate difference. Moreover, we have to specify the rate associated with the control group. If we define and  $p_C$  and  $p_T$  as the success rate in the control and interventional groups, respectively, the number of patients to be recruited in each group could be calculated as [2]:

$$n = \frac{2(Z_{\frac{\alpha}{2}} + Z_{\beta})^2}{\Delta^2}$$

with

$$\Delta = \frac{p_T - p_C}{\sqrt{\frac{p_T(1-p_T) + p_C(1-p_C)}{2}}}$$

Finally for time-to-event data, sample size is usually derived considering survival rates at some time point. Thus, assuming that the survival proportions is  $\pi_C$  in the control group and  $\pi_T$  in the treatment group, at some chosen time, the *a priori* hypothesis is the hazard ratio defined as  $HR = \frac{\log \pi_T}{\log \pi_C}$ . The number of patients to be recruited in each group is then [3]:

$$n = \frac{\left(\frac{HR+1}{HR-1}\right)^2 (Z_{\frac{\alpha}{2}} + Z_{\beta})^2}{2 - \pi_T - \pi_C}.$$

## References

- [1] Julious SA (2004) Sample sizes for clinical trials with normal data. *Statistics in Medicine* 23: 1921–1986.
- [2] Julious SA, Campbell MJ (2012) Tutorial in biostatistics: sample sizes for parallel group clinical trials with binary data. *Statistics in Medicine* 31: 2904–2936.
- [3] Machin D, Campbell MJ, Tan SB, Tan SH (2008) *Sample Size Tables for Clinical Studies*. Chichester, West Sussex, UK ; Hoboken, NJ: Wiley-Blackwell, 3rd edition edition.
