# Supplementary material for: Sample Size Calculation: Inaccurate A Priori Assumptions for Nuisance Parameters Can Greatly Affect the Power of a Randomized Controlled Trial
Source: PubMed Central journal article supplement (PMC4501786; doi:10.1371/journal.pone.0132578), 2015-07-14
Supplement: pone.0132578.s002.pdf [file pone.0132578.s002.pdf]

## S2 Appendix

### Simulation study.

**Continuous outcomes** We hypothesized a difference in means of  $\delta = 2$  between the two groups. We also assumed a standard deviation  $\sigma^{assum} = 10$  in the control group, which led to a hypothesized effect size of  $2/10 = 0.2$ . With such values and considering 80% power with two-sided type I error 5%, the required sample size was 393 patients in each group. Then we considered that the true standard deviation  $\sigma$  differed from the assumed standard deviation  $\sigma^{assum}$ . Then considering the relative error distribution in Fig. 1.a (i.e., with mean  $\mu_\epsilon = 0$  and standard deviation  $\sigma_\epsilon = 0.4$ ), we performed the following steps:

1. We randomly generated a value of the relative error  $\epsilon \sim \Gamma(k, \theta) - 1$  with  $k\theta = \mu_\epsilon + 1$  and  $k\theta^2 = \sigma_\epsilon^2$
2. The true standard deviation was deduced as  $\sigma = \sigma^{assum} \cdot (1 + \epsilon)$
3. The true difference in means remained identical to the hypothesized value  $\delta = 2$
4. Considering a sample size of 786 patients, we derived the power of such a trial to detect a difference of  $\delta$  with standard deviation  $\sigma$

Steps 1 to 4 were repeated 10,000 times.

**Binary outcomes** We hypothesized a difference in success rates of  $\delta = 10\%$  between the two groups and assumed a rate  $p_C^{assum} = 20\%$  in the control group. With such values, and considering 80% power with two-sided type I error 5%, the required sample size was 290 patients in each group. Then, considering the relative error in Fig. 1.b (i.e., with mean  $\mu_\epsilon = 0.05$  and standard deviation  $\sigma_\epsilon = 0.3$ ),

1. We randomly generated a value of the relative error  $\epsilon \sim \mathcal{N}(\mu_\epsilon, \sigma_\epsilon)$
2. The true rate in the control group was deduced from  $\arcsin(\sqrt{p_C}) = (1 + \epsilon)\arcsin(\sqrt{p_C^{assum}})$  because we applied an angular transformation before calculating relative differences.
3. The true difference in rates remained identical to the hypothesized value  $\delta = 10\%$
4. Considering a sample size of 580 patients, we derived the power of such a trial to detect a difference of  $\delta$  with a success rate for the control group of  $p_C$

Steps 1 to 4 were repeated 10,000 times.

**Time-to-event outcomes** We hypothesized a hazard ratio  $HR = \frac{\log 0.8}{\log 0.7} = 0.63$  with the assumption of the probability of events  $p_C^{assum} = 30\%$  in the control group. With such values, and considering 80% power with two-sided type I error of 5%, the required sample size was 296 patients in each group. Then, considering the relative error in Fig. 1.c (i.e., with mean  $\mu_\epsilon = -0.1$  and standard deviation  $\sigma_\epsilon = 0.2$ ),

1. We randomly generated a value of the relative error  $\epsilon \sim \mathcal{N}(\mu_\epsilon, \sigma_\epsilon)$
2. The true probability of events in the control group was deduced from  $\arcsin(\sqrt{p_C}) = (1 + \epsilon)\arcsin(\sqrt{p_C^{assum}})$  because we applied an angular transformation before calculating relative differences.

3. The true hazard ratio remained identical to the hypothesized value  $HR$
4. Considering a sample size of 592 patients, we derived the power of such a trial to detect a hazard ratio of  $HR$  with the probability of event in the control group of  $p_C$

Steps 1 to 4 were repeated 10,000 times.
