# Supplementary material for: Sample Size Calculation: Inaccurate A Priori Assumptions for Nuisance Parameters Can Greatly Affect the Power of a Randomized Controlled Trial
Source: PubMed Central journal article supplement (PMC4501786; doi:10.1371/journal.pone.0132578), 2015-07-14
Supplement: pone.0132578.s003.pdf [file pone.0132578.s003.pdf]

## S3 Appendix

### How an over- or underpowered trial translates to under- or overrecruitment.

**Continuous outcomes** Considering a difference in means of  $\delta = 2$  between the two groups, standard deviation  $\sigma = 10$  in the control group, type I error 5% (i.e.,  $\alpha$ ) and 80% power (i.e.,  $1-\beta$ ), we derived the required sample size of  $n = 393$  patients from the following equation:

$$n = \frac{2(Z_{\frac{\alpha}{2}} + Z_{\beta})^2}{(\delta/\sigma)^2}.$$

From the same equation, we can deduce the standard deviation  $\delta = 2$ ,  $\alpha = 0.05$  and  $\beta = 0.4$  (ie 60% power), which is  $\sigma_{60\%power} = 12.67$ . Because the power decreases at higher standard deviations, if 26% of the trials have a real power  $< 60\%$ , then 26% of the trials have a real standard deviation greater than  $\sigma_{60\%power}$ . Considering a difference in means of  $\delta = 2$  between the two groups, standard deviation  $\sigma = \sigma_{60\%power}$  in the control group, type I error 5% and 80% power, we derived a required sample size of 630 patients in each group, representing a 60% increase in sample size from the 393 initially calculated. Similarly, if 36% of the trials have a real power  $> 90\%$ , then 36% of the trials have a real standard deviation less than  $\sigma_{90\%power} = 8.65$ , which corresponds to 294 patients in each group, so the planned sample size is 25% greater than would be necessary.

**Binary outcomes** As described for continuous outcomes, with a difference in rates of 10% between the two groups and a type I error of 5%, if 16% of the trials have a power  $> 90\%$ , then 16% of the trials have a real success rate in the control group lower than  $p_{C,90\%power} = 0.119$ . Considering 80% power between the two groups, this corresponds to 217 patients in each group, so the planned sample size is 25% greater than would be necessary.

**Time-to-event outcomes** As described for continuous outcomes, with a hazard ratio of  $HR = \frac{\log 0.8}{\log 0.7} = 0.63$  between the two groups and type I error 5%, if 18% of the trials have a power  $< 60\%$  then 18% of the trials have a real probability of events in the control group lower than  $p_{C,60\%power} = 0.189$ . Considering 80% power between the two groups, this corresponds to 475 patients in each group, representing a 60% increase in sample size. Likewise, if 6% of the trials have power  $> 90\%$ , then 6% of the trials have a real probability of events in the control group greater than  $p_{C,90\%power} = 0.398$ . Considering 80% power between the two groups, this corresponds to 221 patients in each group, so the planned sample size is 25% greater than would be necessary.
